# Supplementary material
Source: PubMed Central journal article supplement (PMC8655819)

**Supplementary Fig. S1**

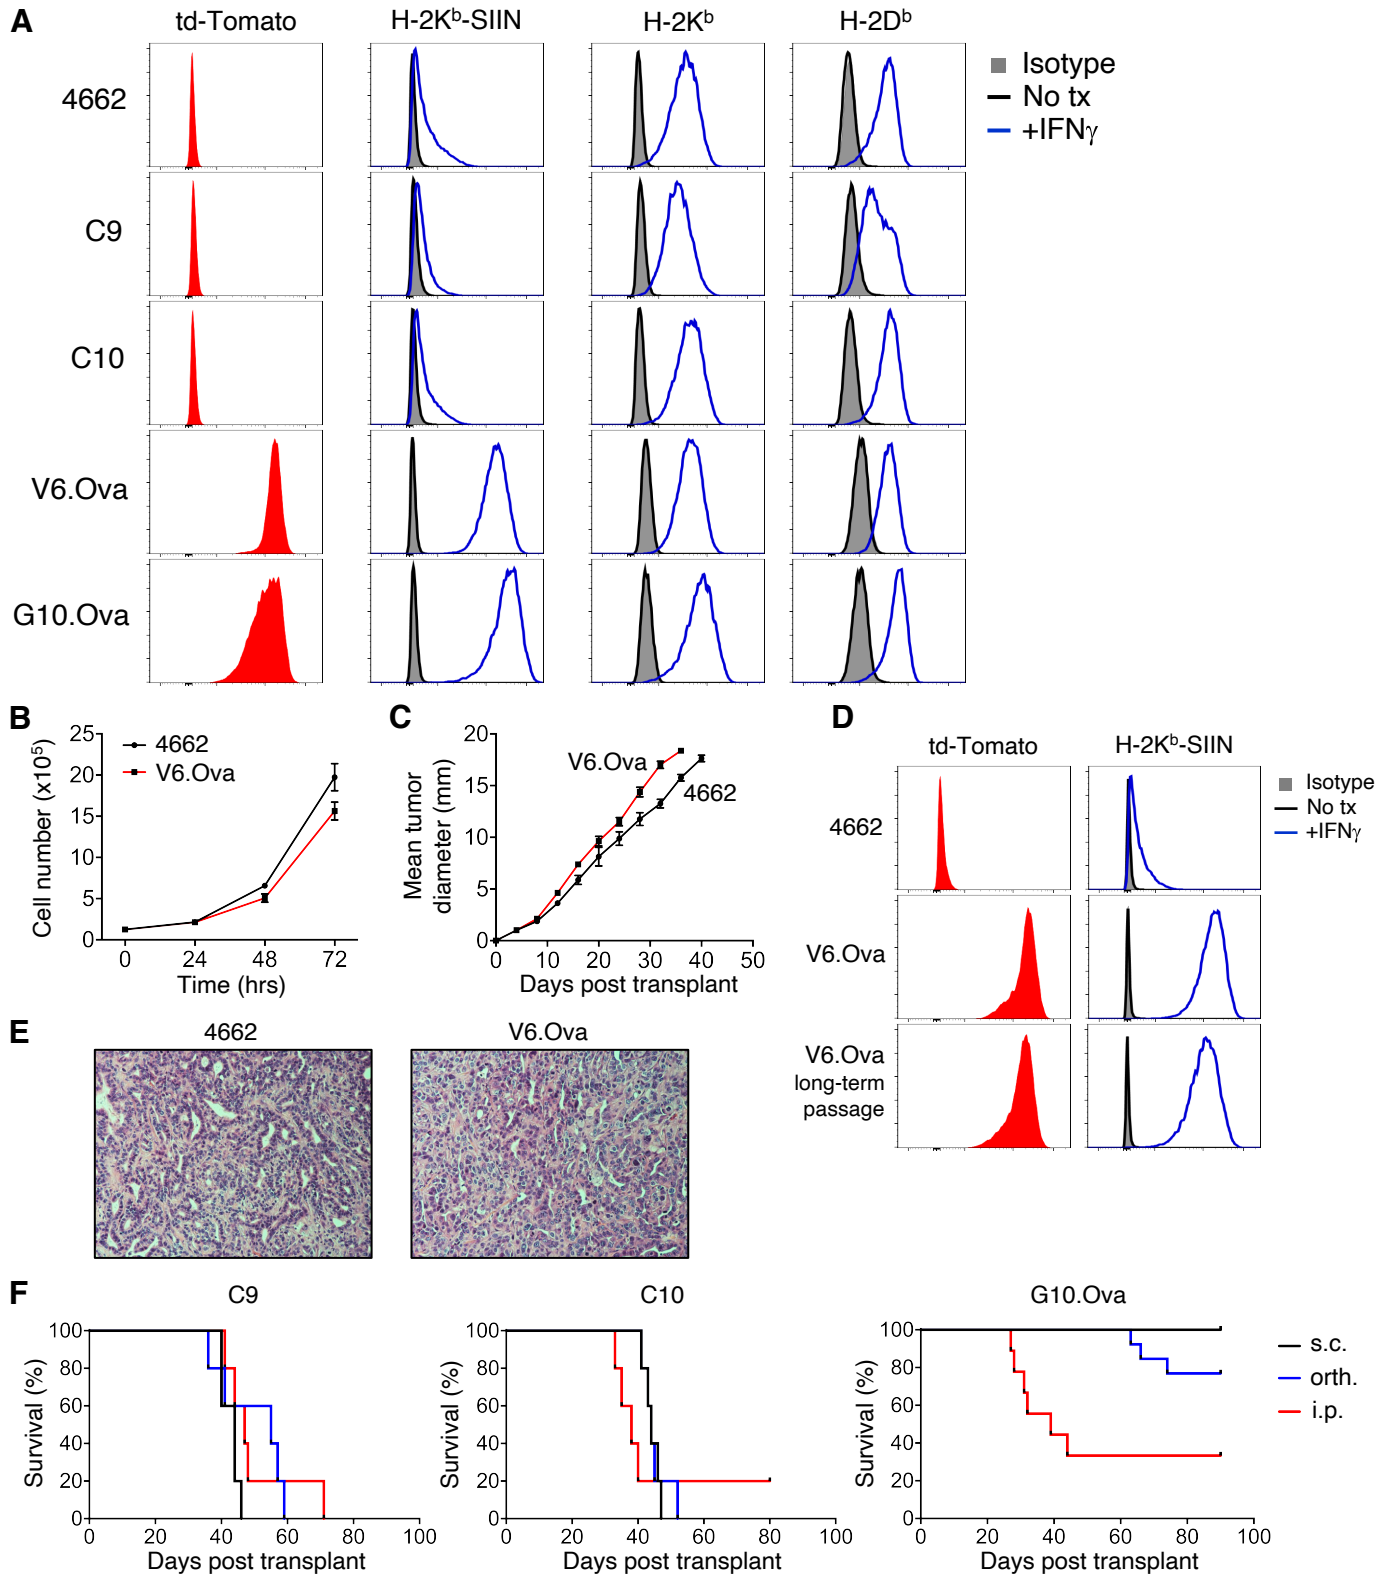

Supplement: NIHMS1718353-supplement-2.pdf [file NIHMS1718353-supplement-2.pdf]

**Supplementary Fig. S3**

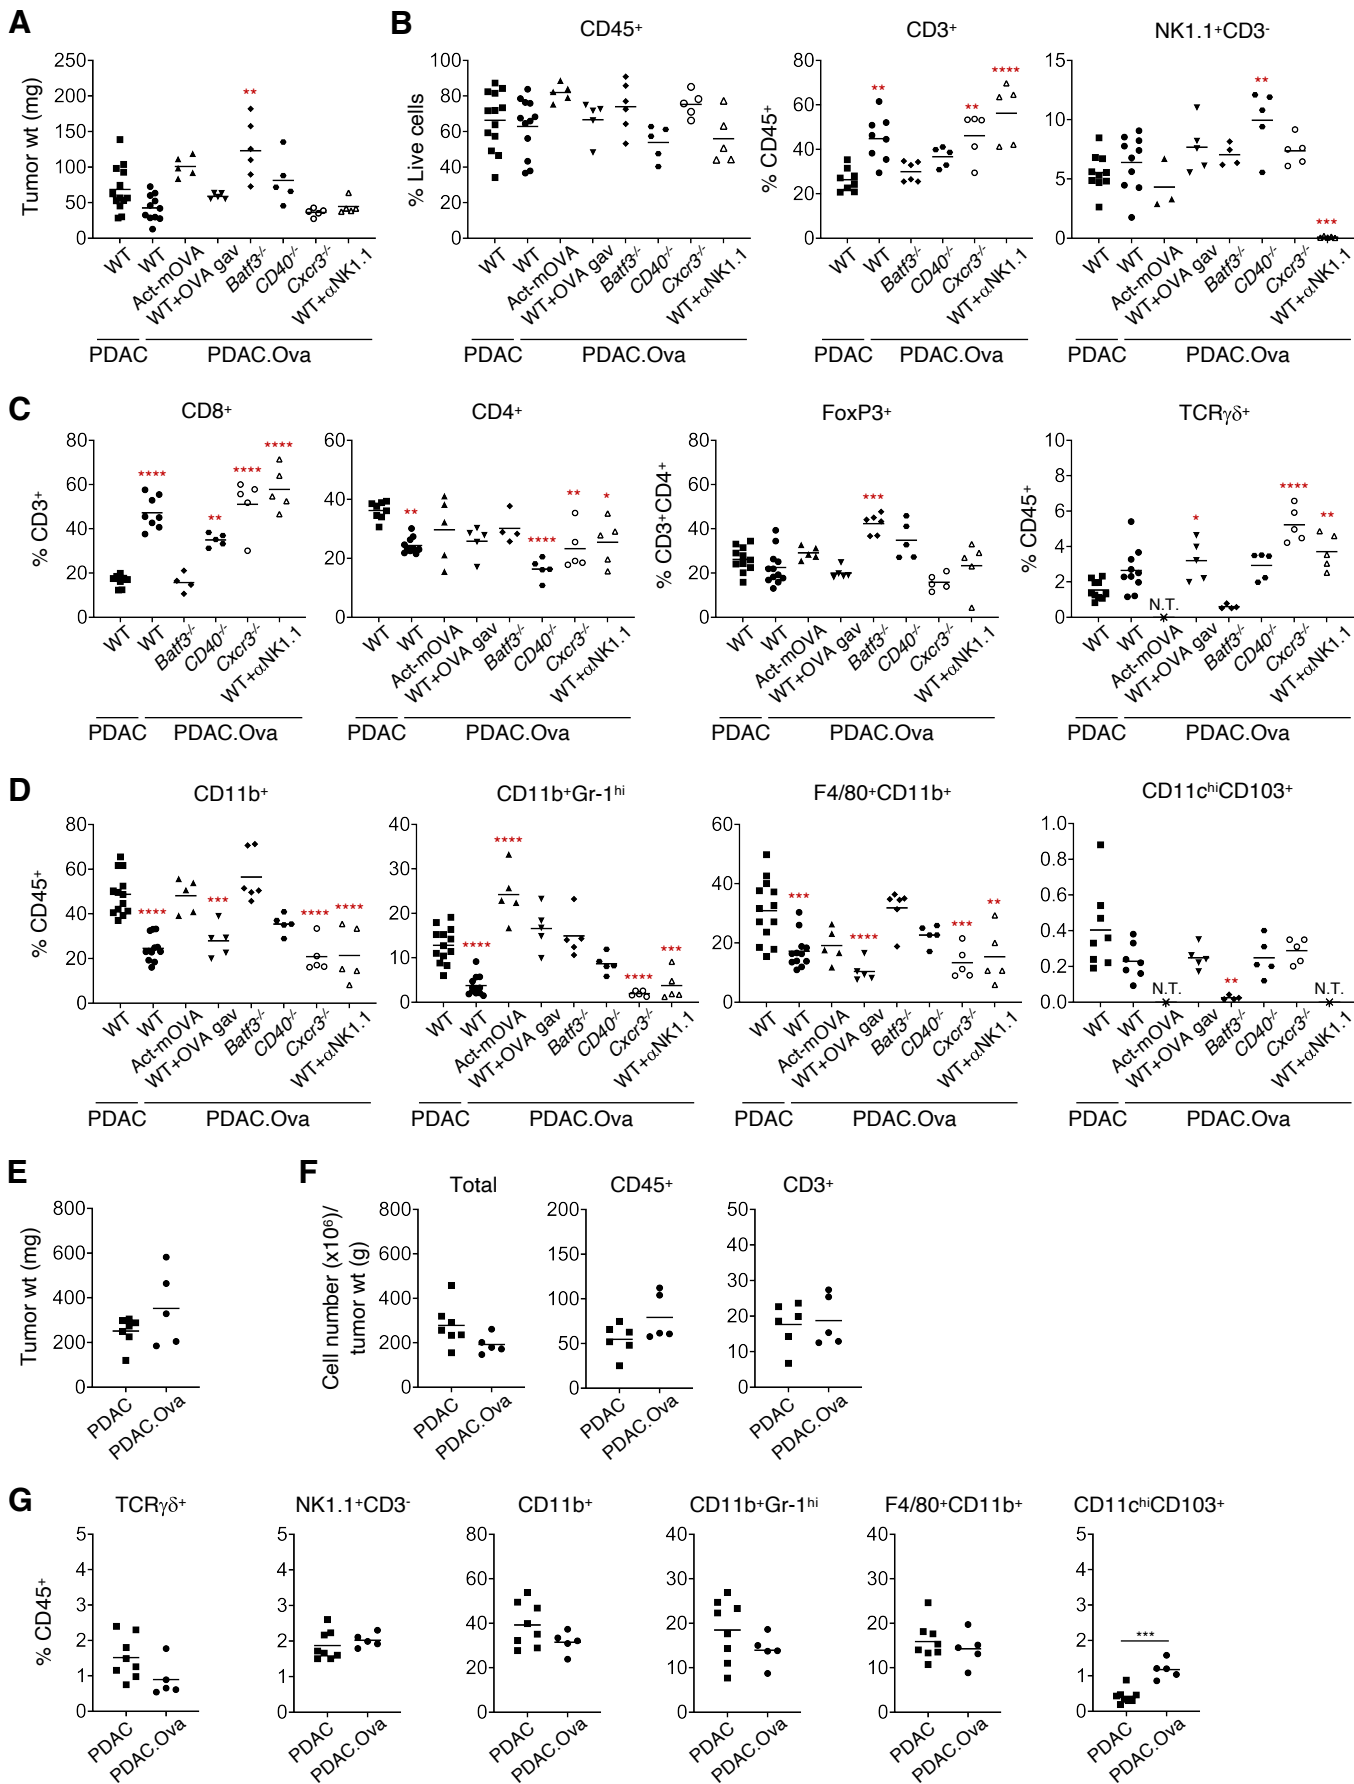

Supplement: NIHMS1718353-supplement-4.pdf [file NIHMS1718353-supplement-4.pdf]

Supplementary Fig. S4

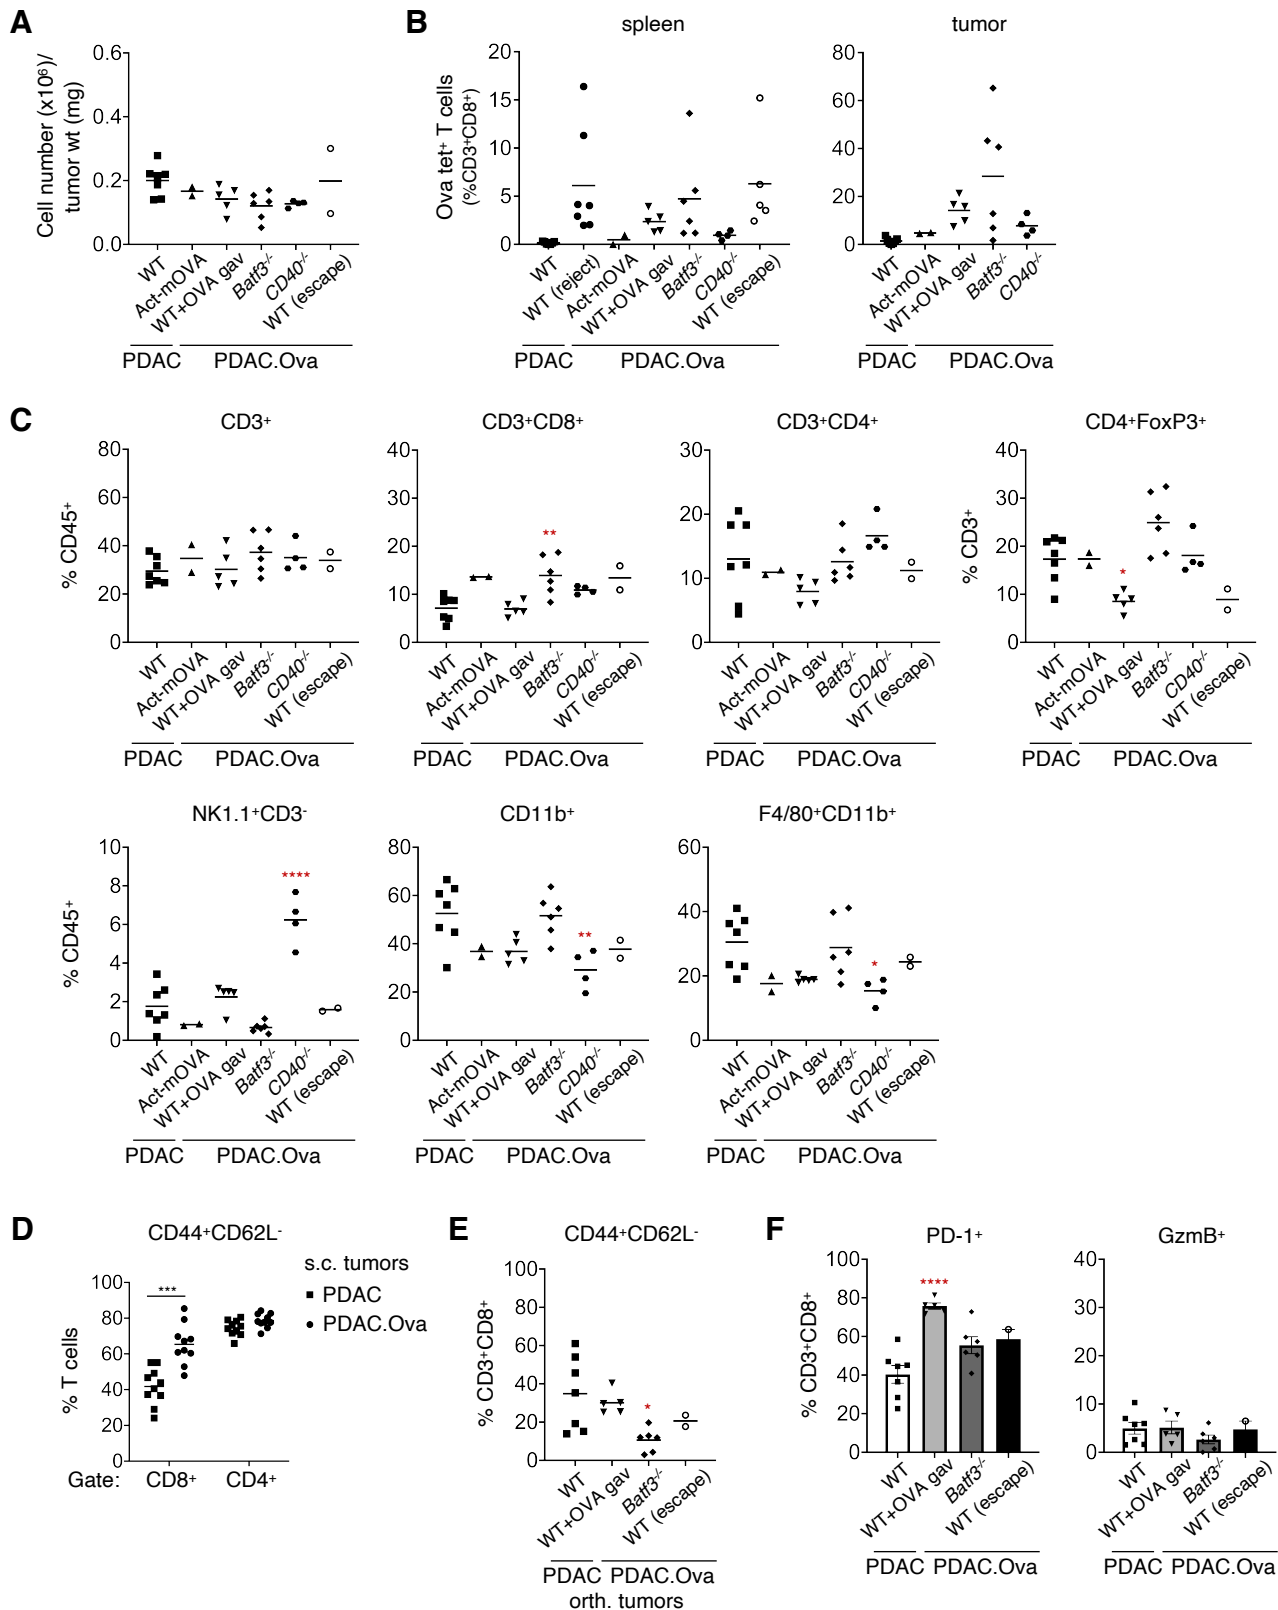

Supplement: NIHMS1718353-supplement-5.pdf [file NIHMS1718353-supplement-5.pdf]

**Supplementary Fig. S6**

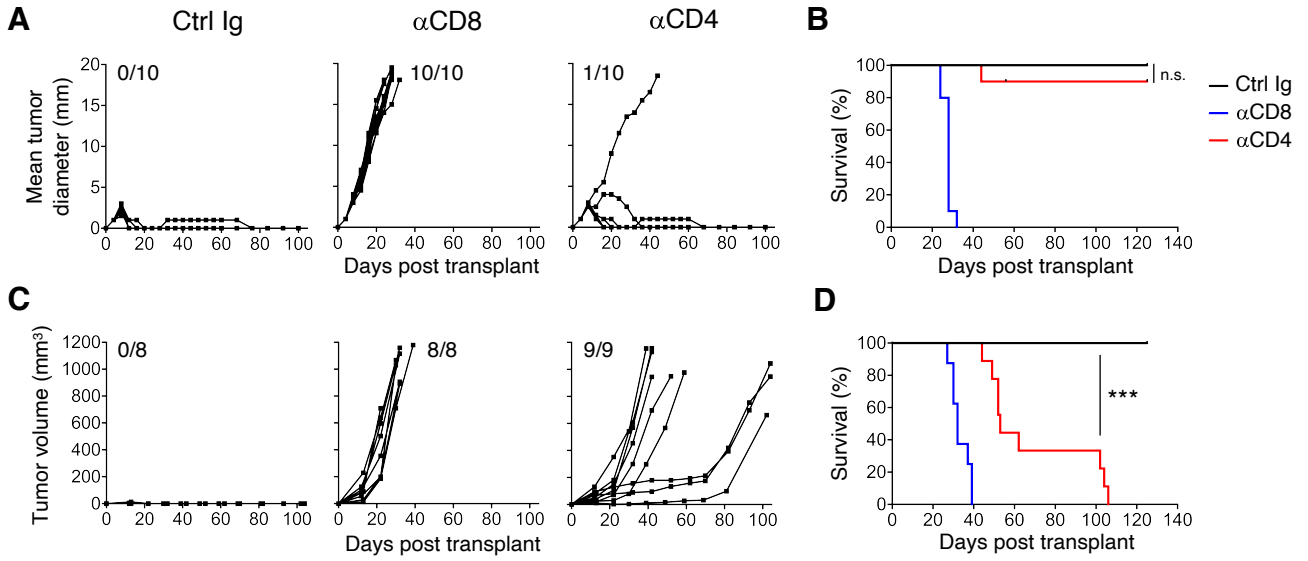

Supplement: NIHMS1718353-supplement-7.pdf [file NIHMS1718353-supplement-7.pdf]
